# Supplementary material for: Predicting high thermoelectric performance of ABX ternary compounds NaMgX (X = P, Sb, As) with weak electron–phonon coupling and strong bonding anharmonicity
Source: Royal Society of Chemistry journal article supplement (doi:10.1039/c6tc00461j), 2016-01-01
Supplement: c6tc00461j1.pdf [file c6tc00461j1.pdf]

## SUPPLEMENTARY INFORMATION

### **Predicting high thermoelectric performance of ABX ternary compounds NaMgX (X=P, Sb, As) with weak electron-phonon coupling and strong bonding anharmonicity**

A. J. Hong<sup>1</sup>, J. J. Gong<sup>1</sup>, L. Li<sup>1</sup>, Z. B. Yan<sup>1</sup>, Z. F. Ren<sup>2</sup>, and J. -M. Liu<sup>1</sup>

*<sup>1</sup>Laboratory of Solid State Microstructures and Innovation Center of Advanced Microstructures, Nanjing University, Nanjing 210093, China*

*<sup>2</sup>Department of Physics and TcSUH, University of Houston, Houston, TX 77204, USA*

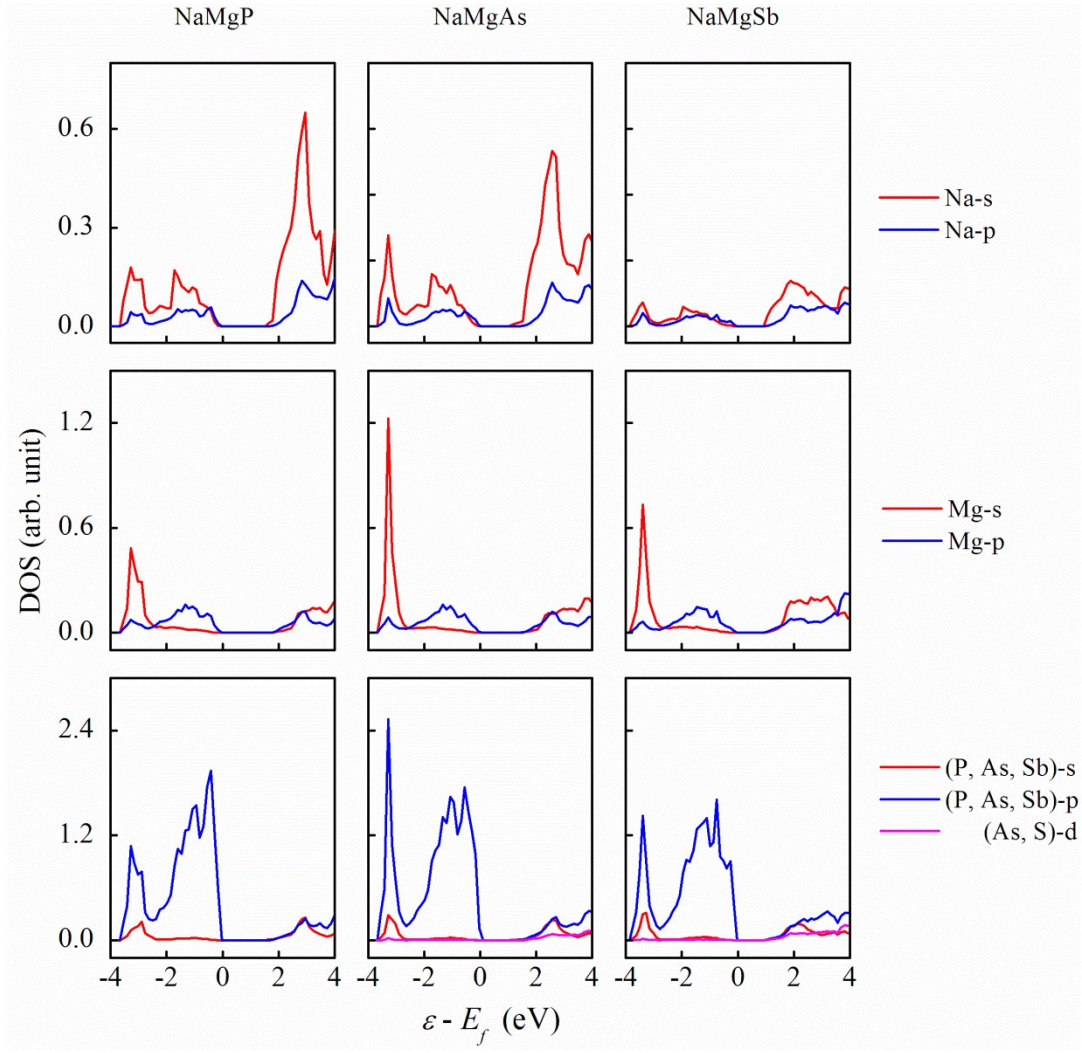

**Figure S1.** (Color online) Na-s/p, Mg-s/p, and X-s/p/d partial densities of states for NaMgX (X=P, Sb, As).

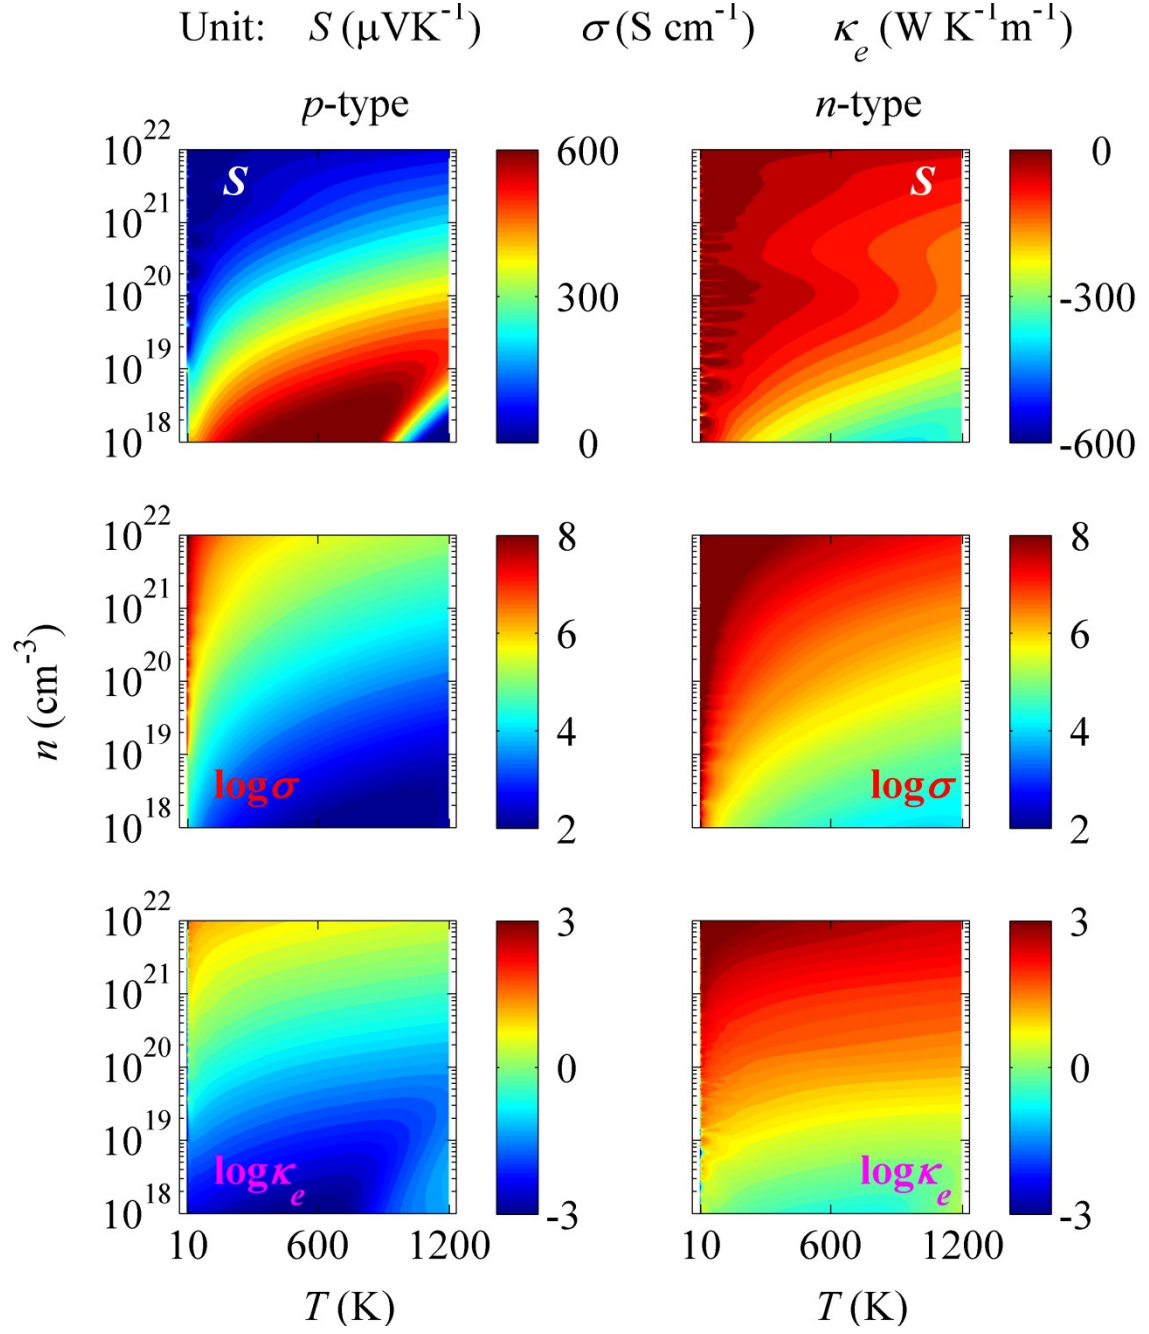

**Figure S2.** (Color online) The calculated  $S$  (top row),  $\log \sigma$  (middle row), and  $\log \kappa_e$  (bottom row) in the  $(T, n)$  plane for carrier-doped NaMgP compound. Left panel: *p*-type and right panel: *n*-type. Here  $\log$  is the natural algorithm.

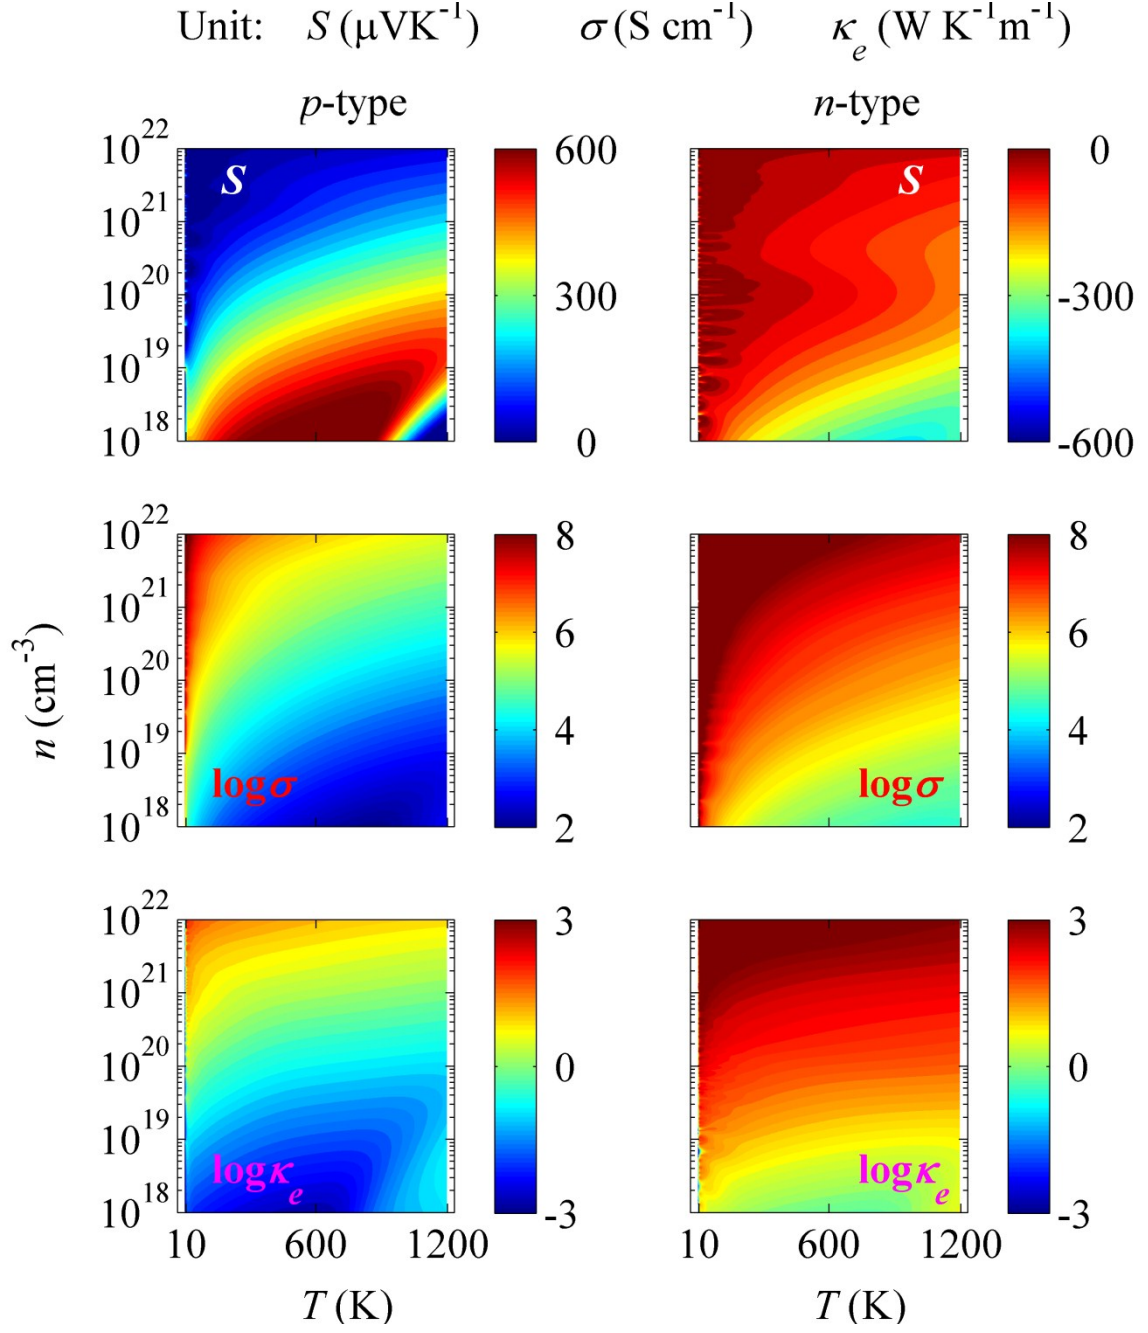

**Figure S3.** (Color online) The calculated  $S$  (top row),  $\log \sigma$  (middle row), and  $\log \kappa_e$  (bottom row) in the  $(T, n)$  plane for carrier-doped NaMgAs compound. Left panel: *p*-type and right panel: *n*-type. Here  $\log$  is the natural algorithm.
